# Supplementary material for: The human touch: a meta-analysis of anthropogenic effects on plant-pollinator interaction networks
Source: PeerJ. 2024 Jun 27;12:e17647. doi: 10.7717/peerj.17647 (PMC11214738; doi:10.7717/peerj.17647)
Supplement: Supplemental Information 3 [file peerj-12-17647-s003.xlsx]

## Sheet: Meta-analysis (PRISMA list)
Author	TE	seTE	Group	Continent	Weather	Anthropogenic activity	Coverage	monitored year	published year
Vanbergen-pl-2014	-1.02	0.47	plants	Europe	Cfb	Agriculture	1000	2008	2014
Motivans-pl-2021	0.43	0.83	plants	Europe	Cfb	Agriculture	1200	2018	2021
Shinohara-pl-2019	-1.48	0.82	plants	Asia	Cfa	Agriculture	4000	2016	2019
Da_silva-pl-2022	-1.29	0.64	plants	America	Cfa	Fires	1200	2017	2022
Weiner-pl-2014	0.45	0.22	plants	Europe	Cfa	Agriculture	40000	2007	2014
Marin-pl-2020	-2.02	0.58	plants	America	Cwb	Urbanization	7200	2015	2020
Sritongchuay-pl-2022	0.75	0.46	plants	Asia	Am	Deforestation	75500	2012	2022
Hagen-pl-2010	-1.72	0.59	plants	Africa	Af	Agriculture	1800	2006	2010
Olsson-pl-2021	-0.85	0.34	plants	America	Csb	Agriculture	7400	2016	2021
Burkle-pl-2012	1.74	0.53	plants	America	Cfa	Fragmentation	4500	2010	2012
Fründ-pl-2010	0.89	0.28	plants	Europe	Cfb	Agriculture	40	2006	2010
Pinto-pl-2020	2.71	0.6	plants	America	Aw	Fragmentation	33000	2017	2020
Ferreira-pl-2020	1.5	0.6	plants	America	BSh	Fragmentation	36000	2011	2020
Peralta-pl-2017	0.34	0.38	plants	America	BWk	Fires	20000	2008	2017
Stein-pl-2020	0.74	0.73	plants	Africa	BSh	Deforestation	40000	2014	2020
Kehinde-pl-2014	0.83	0.66	plants	Africa	Csa	Agriculture	50000	2010	2014
Traveset-po-2018	0.41	0.42	pollinators	Europe	Csa	Urbanization	2300	2011	2018
Weiner1-po-2011	0.61	0.32	pollinators	Europe	Cfa	Agriculture	71400	2008	2011
Weiner2-po-2011	0.27	0.31	pollinators	Europe	Cfa	Agriculture	71400	2008	2011
Weiner3-po-2011	0.84	0.33	pollinators	Europe	Cfa	Agriculture	71400	2008	2011
Weiner4-po-2011	-0.58	0.32	pollinators	Europe	Cfa	Agriculture	71400	2008	2011
Weiner5-po-2011	-0.42	0.32	pollinators	Europe	Cfa	Agriculture	71400	2008	2011
Jauker-po-2019	2.22	0.31	pollinators	Europe	Cfb	Fragmentation	NA	2004	2019
Marin-po-2020	0.08	0.47	pollinators	America	Cwb	Urbanization	7200	2015	2020
Kehinde-po-2014	0.56	0.64	pollinators	Africa	Csa	Agriculture	50000	2010	2014
Motivans-po-2021	1.34	0.94	pollinators	Europe	Cfb	Agriculture	1200	2018	2021
Stein-po-2020	2.03	0.91	pollinators	Africa	BSh	Deforestation	40000	2014	2020
Shinohara-po-2019	-0.75	0.74	pollinators	Asia	Cfa	Agriculture	4000	2016	2019
Weiner-po-2014	0.16	0.12	pollinators	Europe	Cfa	Agriculture	40000	2007	2014
Hagen-po-2010	1.06	0.5	pollinators	Africa	Af	Agriculture	1800	2006	2010
Fründ-po-2010	1.7	0.31	pollinators	Europe	Cfb	Agriculture	540	2006	2010
Escobedo-po-2022	1.08	0.53	pollinators	America	Aw	Deforestation	8000	2020	2022
Da_silva-po-2022	-0.79	0.6	pollinators	America	Cfa	Fires	1200	2017	2022
Sritongchuay-po-2022	2.29	0.58	pollinators	Asia	Am	Deforestation	75500	2012	2019
Burkle-po-2012	1.27	0.49	pollinators	America	Cfa	Fragmentation	4500	2010	2012
Ferreira-po-2020	5.51	1.17	pollinators	America	BSh	Fragmentation	36000	2011	2020

## Sheet: Network metrics
Anthropogenic activity	Metric	Value
Fragmentation	Nestedness	11.21
Fragmentation	Nestedness	17
Fragmentation	Nestedness	23.19
Fragmentation	Nestedness	26.21
Fragmentation	Nestedness	46
Fragmentation	Nestedness	16.14
Agriculture	Nestedness	14.35
Agriculture	Nestedness	20.63
Agriculture	Nestedness	21.93
Agriculture	Nestedness	15.65
Agriculture	Nestedness	28.86
Deforestation	Nestedness	2.25
Deforestation	Nestedness	33.85
Deforestation	Nestedness	56.6
Deforestation	Nestedness	53.11
Urbanization	Nestedness	9.4
Urbanization	Nestedness	42.33
Fragmentation	Specialization	0.82
Fragmentation	Specialization	0.5
Fragmentation	Specialization	0.71
Fragmentation	Specialization	0.88
Fragmentation	Specialization	0.58
Agriculture	Specialization	0.63
Agriculture	Specialization	0.24
Agriculture	Specialization	0.51
Agriculture	Specialization	0.15
Agriculture	Specialization	0.35
Agriculture	Specialization	0.62
Agriculture	Specialization	0.59
Deforestation	Specialization	0.45
Deforestation	Specialization	0.35
Deforestation	Specialization	0.12
Urbanization	Specialization	0.68
Urbanization	Specialization	0.51
Urbanization	Specialization	0.84
Urbanization	Specialization	0.53
Fragmentation	Conectance	0.24
Fragmentation	Conectance	0.11
Fragmentation	Conectance	0.08
Fragmentation	Conectance	0.25
Agriculture	Conectance	0.33
Agriculture	Conectance	0.36
Agriculture	Conectance	0.12
Urbanization	Conectance	0.06
Urbanization	Conectance	0.14
Deforestation	Conectance	0.16
Deforestation	Conectance	0.32
Fragmentation	Modularity	0.69
Fragmentation	Modularity	0.39
Agriculture	Modularity	0.33
Urbanization	Modularity	0.56
Deforestation	Modularity	3.36
Fires	Modularity	0.68
